# Supplementary material for: The Skeletal Proteome of the Coral Acropora millepora: The Evolution of Calcification by Co-Option and Domain Shuffling
Source: PubMed Central journal article supplement — Mol Biol Evol. 2013 Jun 12;30(9):2099–112. doi: 10.1093/molbev/mst109 (PMC3748352; doi:10.1093/molbev/mst109), 2013-06-12
Supplement: supp_mst109_Supporting_File_1.pdf [file supp_mst109_Supporting_File_1.pdf]

Supporting Information

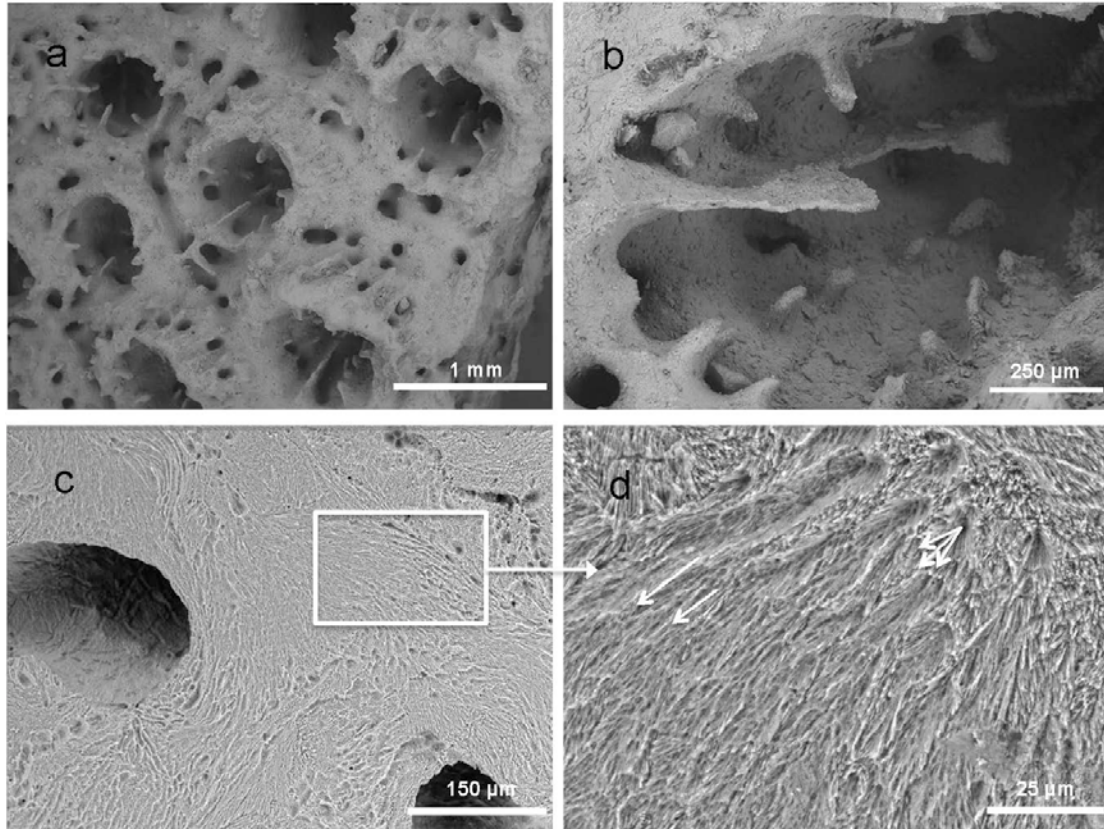

Figure S1 - **SEM images from skeleton macro and microstructure.** (A) Radial corallites arrangement with separate walls and internal septa, (B) Closer view into corallites showing different vestigial and complete septa. Polished and EDTA-etched sections from a longitudinal cut: (C) Fibrous microstructure, (D) Close-up showing evidence of crystalline fibers. The skeleton of *Acropora millepora* is composed exclusively of aragonite. Macroscopic views (Figure 1A) of the skeleton surface reveal cup-like rounded corallites separated by distinct walls and the highly porous coenosteum. The radial corallites are evenly distributed and of approximately equal size (Figure 1A), with complete and incomplete septa (Figure 1B). In longitudinal sections (Figure 1C), a rather uniform microstructure is evident, but with unevenly distributed porosity. At higher magnification (Figure 1D), individual needle-like fibers, constituting the basic units of the coral microstructure (Nothdurft and Webb 2006), are observed. These exhibit a discrete size with trabecular orientation (white arrows on Figure 1D) (Wendt 1990).

```

SAARP1/1-386 1 MAFVS CFHRLLLFLCLALFMAAECRPELNNKQVDSDETI SDDDV SARVQPNGGKIMIVR-DNDYDASDD--- 68
SAARP2/1-391 1 ----HCLPLE----SIALFLV--CLADEERKDDNTKTIRGKNVSAKIFGRSGKIMIVRVDDDEDTKDVTVD 62

SAARP1/1-386 69 --NNDNDNDDNNDNND-----NNDNDNDVDNDNDNDDDFDSDNDMLSFELDSI 117
SAARP2/1-391 63 RVS DKKDNVDDRRDNDREESIDKKTVDKKNPIDDKDDKDDKDDVDNDNDK-DDDFRDDDELDFELDEL 133

SAARP1/1-386 118 EEKDS DGNDV GSTEGHSV ESEFDRP FSLSSVDRNSNALGVAAINVNLSLKLEDSDADVDIMLYLFR EDGTIS 189
SAARP2/1-391 134 KEVDADGDEV D--DKHSVD SFDDVEFQLSHVRTASRFKGLAVISVNLSTHLQNNKANVGI MVYLFLEPGSVT 203

SAARP1/1-386 190 FGNETF DVQAGTVKFNIKISNWFCDGSAQDCSEAKAGEYLDVNIKFKSKDTPIEVTDEERK SQNKPAVCKD 261
SAARP2/1-391 204 FGNETFNVKAGTVKFNIEVNNWFCEGSSPACSSRKEGKFLDLTMKIKSKDSPTVEDEDDRKK----AVCND 271

SAARP1/1-386 262 KDTPTDSDPDDSSDNAN GDDDDDDDCPHIYNMGGDSEMLLNRGVM-NGDTYTAMPFGFPKVEIEDGEKI 332
SAARP2/1-391 272 KDDNDDDDVDVDD-----DDDDDDDDDCPIIYSMGGDSEMLLNRGVM LDDDEYTAMPVGFPKLEIEDETRKF 337

SAARP1/1-386 333 KFRVPKFDDNVNIDPSVTPG-RVPKNASPSPALCLKIHILFIALLA VTLFINSW 386
SAARP2/1-391 338 VFRIPKFKSRALVDP SVTPGERTPKLAISAGTW-LQNFLLVTVLVQIAVMEVFH- 390
    
```

Figure S2 - Pairwise sequence alignment of the secreted acidic Asp-rich proteins: SAARPs 1 and 2 (UniprotKB Ac. Nos.: B3EWY6, B3EWY8, respectively). Identical residues are dyed in blue. Sequence alignments were performed and visualized with Jalview (Waterhouse *et al.* 2009).





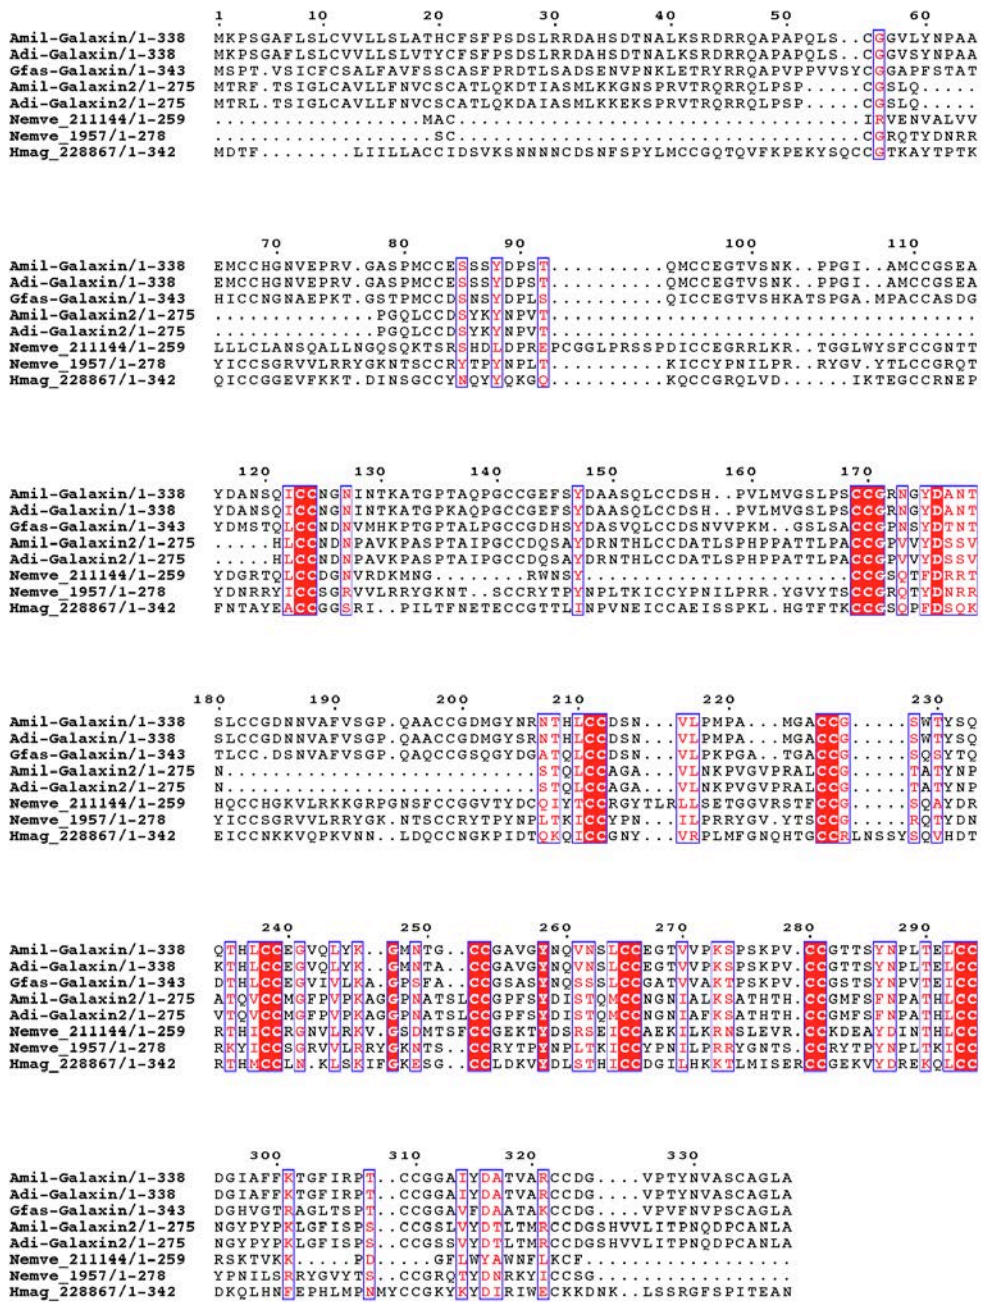

Figure S6 - Multiple sequence alignment showing the sequence similarities between galaxins from *Acropora millepora* (Amil), *Acropora digitifera* (Adi), *Galaxea fascicularis* (Gfas) and the detected homologues from *Nematostella vectensis* (Nemve) and *Hydra magnipapillata* (Hmag). Amil-Galaxin (Uniprot Ac. No.: D9IQ16), and Gfas-Galaxin (Uniprot Ac. No.: Q8I6S1) correspond to the same form of galaxin and are grouped together with Adi-Galaxin1 (predicted from Adi transcriptome: EST\_assem\_14006). Subsequently the Amil-Galaxin 2 (Uniprot Ac. No.: B8UU51) and Adi-Galaxin 2 (predicted from Adi transcriptome: EST\_assem\_8935) are shorter lacking the segments in the positions 60-77, 93-120 and 181-206 of the alignment. Finally the distantly related sequences from *Nematostella* (Nemve\_211144 (GI:156374951); Nemve\_1957 (GI:156377965)) and *Hydra* (GI:221103149) show the conservation of nine double-Cys residues and the presence of other identical residues dyed in red (A). Regions with high frequency of semi-conserved substitutions are also indicated (A). Sequence alignments were performed with MUSCLE (Edgar 2004) and visualized with Esript 2.2 (Gouet et al. 2000).



SOMP\_similar\_to\_cephalotoxin/1-473 1 RWLGWQK[CW]I[SCLFSS]ISSGLD[PG]--EQA[VTT]LD[TAQFA]IA[NEEY]AQAKA[E]--EALKV[S]TQARSAD  
 SE-cephalotoxin/1-1052 1 VIL[LFAL]L[WAANAA]P[E]IHTTR[NVPE]E[IKRPN]S[TE]IETPA[V]K[Q]E[TPS]I[FLLT]L[V]EA[EADV]S[ST]L[ETMDK]

SOMP\_similar\_to\_cephalotoxin/1-473 70 LLRRQT-E[LA]K[FGS]K[VG]K[AL]K[VQAA]S[A]IA[S]FV[TF]F[MP]S[E]L[DV]I[TS]I[NER]F[NE]VNA[KLD]R[I]D[KLDE]M[E]K[S]  
 SE-cephalotoxin/1-1052 74 RNKNSAK[LS]K[IGNMKS]L[S]L[S]V[FGFL]L[S]L[S]V[VT]T[S]D[LQV]I[SDM]----F[TCV]N[KL]D[IK]D[KL]D[LM]S

SOMP\_similar\_to\_cephalotoxin/1-473 142 [KA]TAFNV[FL]SAW[KW]EYK[VG]AKK[KL]S[DI]R[KA]M[G]T[K]T[QR]I[D]V[KL]A[E]EYV[KY]E[ET]N[LDC]N[VLS]Y[RM]A[AL]  
 SE-cephalotoxin/1-1052 143 V[ELQ]---G--L[TN]Y[PWC]YS[V]K[NG]I[E]K[L]I[E]T[Y]K[M]V[E]E[T]D[M]N[KR]L[WA]E[N]F[L]F[E]N[Q]I[E]S[N]I[N]L[L]K[L]T[T]T

SOMP\_similar\_to\_cephalotoxin/1-473 215 P[ES]T[QRN]I[F]R[F]A[Q]F[C]D[I]T[K]L[S]E[M]L[V]Q[N]M[TS]G[Q]Q[K]L[Y]Y[F]K[G]D[QR]N[S]S[F]K[D]Q[M]Y[F]K[R]G[F]  
 SE-cephalotoxin/1-1052 212 T[DA]V[HQ]N[L]F[E]L[D]E[A]C[C]D[I]R[TR]L[Y]M[H]V[R]I[F]Y[Q]T[QL]V[L]A[Y]N[S]K---Q[M]D[P]E[M]K[KY]L[N]A[L]F[I]R--R[N]M[Y]

SOMP\_similar\_to\_cephalotoxin/1-473 288 [DR]V[WHC]R[NS]L[D]Y[K]R[D]A[K]I[L]K[N]M[R]G[S]S[R]E[S]I[V]R[A]F[N]E[L]K[V]K[Y]P[W]Y[T]W[V]A[V]K[S]D[R]P[R]I[R]G[L]E[L]R[G]S[T]Y  
 SE-cephalotoxin/1-1052 282 [GS]R[V]W[HC]E[T]T[IA]Q[S]K[K]D[I]D[V]K[T]N[A]K[F]G[I]T[V]L[R]K[I]N[S]E[L]S[R]K[Y]P[W]Y[S]W[S]I[V]V[K]K[M]L[A]N[QR]N[S]T[L]-G[N]Q[I]

SOMP\_similar\_to\_cephalotoxin/1-473 361 [R]L[E]D[R]D[A]K[K]V[K]G[V]Y[V]E[D]T[R]S[S]A[S]D[S]T[Q]A[Q]T[L]V[F]K[K]C[D]C[N]S[D]Y[I]Y[A]D[N]I[L]S[K]R[C]G[E]S[T]L[E]R[L]V[D]  
 SE-cephalotoxin/1-1052 354 Y[E]E---[V]G[H]G[S]N[E]V[V]W[Q]F[K]E[H]S[Q]E[D]I[Q]K[A]T[A]V[L]T[I]C[K]C[Q]S[H]V[F]T[P]S[N]M[L]N[K]D[T]C[P]N[N]Q[V]P[V]K[A]

SOMP\_similar\_to\_cephalotoxin/1-473 434 F[K]Q[C]P[V]C[H]R[W]P[Y]S[I]T[C]Y[C]A[R]V[K]D[S]Q[N]M[G]L[Y]C[I]S[S]Q[H]H  
 SE-cephalotoxin/1-1052 425 E-----[I]D[R]E[F]R-----D[E]I[Q]R[K]K[S]D---V[F]W[V]A[G]F[K]

Figure S7 - Pairwise sequence alignment between the cephalotoxin-like SOMP (Uniprot Ac. No.: B7W114) and the SE-cephalotoxin from *Sepia esculenta* (Uniprot Ac. No.: B2DCCR8). Identical residues are dyed in blue. Conserved and semi-conserved substitutions are dyed in shades of grey. Sequence alignments were performed and visualized with Jalview (Waterhouse et al. 2009).

M\_musculus/1-1159 --MFLKQPGGC[LL]Q-FLG-----LLGLVGA[VRT]Y[I]G[V]E[E]Y---WNYVPQ[G]K[V]I[TG]K[S]F[ED]K[L]A[T]L[F]L---E[R]G[P]N[R]I[G]G 72  
 H\_sapiens/1-1159 --MPRKQAGC[I]L[L]T[FL]G---L--L[SG]L[VG]T[VRT]Y[I]G[V]E[E]Y---WNYVPQ[G]K[V]I[TG]K[S]F[ED]K[L]A[T]L[F]L---E[R]G[P]N[R]I[G]G 73  
 Ap\_pallida/1-1121 MSFLVYLT[MF]V[LA]S[CA]Q[H]C[E]G[H]L[N]H[A]S[K]G[I]T[R]N[Y]I[A]A[V]E[R]D---WDA[RS]G[F]N[AN]G[I]K[D]N[D]S[D]A[S]V[F]T---V[R]E[D]T[T]G[V]K 81  
 Ac\_millepora/1-1114 --MMDRSNA[F]V[L]TAC[F]I[S]Q---LICHVA[I]T[R]T[Y]I[A]A[V]E[K]E---WDA[RS]G[F]N[AN]G[I]K[V]K[L]E[D]S[D]A[T]V[A]---T[K]G[A]H[R]I[G]R 75  
 H\_magnipapillata/1-714 --MLF[K]G[T]V[L]I[L]L[H]E[F]-----VIA[E]I[P]L[D]Y[K]N[E]C[S]P[K]K[E]C[E]F[W]L[E]I[K]E[K]L[T]M[I]Y[K]N[L]L[Y]S[S]G[S]L[E]L[Y]N[E]S[P]G[P]N[A]T[K]I[P] 78

M\_musculus/1-1159 YKKA[Y]R[H]F[D]G[S]Y[S]T[E]I[P]K[P]W[L]G[F]L[G]P[I]L[R]A[E]V[G]D[V]I[V]H[L]M[F]-A[S]R[P]F[S]L[H]P[H]G[V]F[Y]D[K]S[E]G[A]L[Y]P[D]G[T]S[G]R[N]K[E]D[M]V[P]P[G]K 159  
 H\_sapiens/1-1159 YKKA[Y]R[R]F[D]G[S]Y[S]T[E]I[P]K[P]W[L]G[F]L[G]P[I]L[R]A[E]V[G]D[V]I[V]H[L]M[F]-A[S]R[P]Y[S]L[H]P[H]G[V]F[Y]N[K]D[S]E[G]A[L]Y[P]D[G]T[S]G[R]N[K]D[M]V[P]P[G]K 160  
 Ap\_pallida/1-1121 YK[V]I[Y]R[E]Y[D]G[T]F[T]S[E]K[H]P[K]H[L]C[L]P[V]L[Y]G[E]D[V]I[V]R[V]I[F]K[N]-A[T]R[R]Y[S]V[H]P[H]G[T]F[Y]K[K]N[A]E[G]A[L]Y[E]D[E]T[S]Q[D]K[H]D[H]V[P]P[G]K 168  
 Ac\_millepora/1-1114 YD[K]V[L]Y[R]E[E]D[S]F[T]E[K]P[H]P[K]Y[L]G[F]L[G]P[I]L[K]G[E]I[G]D[T]I[V]H[F]K[N]-G[S]R[V]Y[S]M[H]P[H]G[V]F[Y]S[K]D[S]E[G]A[L]Y[E]D[N]T[K]G[K]K[D]K[V]P[P]G 162  
 H\_magnipapillata/1-714 L[D]D[V]I[S]A[D]G[E]N[R]M[V]I[V]N[G]T[L]P-----G[P]I[V]V[Y]E[H]Q[N]L[I]H[V]K[N]M[L]S[D]V[T]L[H]W[R]G[L]---H[Q]K[G]T[F]M[D]G[V]G---W[I]S[Q]C[P]I[S]A[G]Q 155

M\_musculus/1-1159 NYT[Y]V[W]P[V]R[E]E[Y]A[P]A[D]A[N]C[L]T[W]Y[H]S[H]I[D]A[P]K[D]I[C]S[L]I[G]P[L]L[V]K[E]G[V]L[N]R[Y]S[G]M[R]T[D]V[D]R[E]F[V]I[M]F[L]V[D]E[N]Q[S]W[Y]L[D]D[N]I[K]Q[F] 247  
 H\_sapiens/1-1159 NYT[Y]V[W]P[V]R[E]E[Y]A[P]A[D]A[N]C[L]T[W]Y[H]S[H]I[D]A[P]K[D]I[C]S[L]I[G]P[L]L[V]K[E]G[V]L[N]R[Y]S[G]M[R]T[D]V[D]R[E]F[V]I[M]F[L]V[D]E[N]Q[S]W[Y]L[D]D[N]I[K]Q[F] 248  
 Ap\_pallida/1-1121 NYT[Y]T[W]E[V]K[P]N[H]G[T]K[A]D[S]N[C]L[T]W[Y]H[S]H[L]E[P]G[K]D[I]N[T]L[E]I[G]P[L]I[T]C[K]K[D]T[F]D[S]-N[G]K[R]K[D]V[D]Q[D]F[L]L[F]S[V]F[D]E[N]A[S]W[L]D[E]N[I]D[R]F 255  
 Ac\_millepora/1-1114 TMT[Y]S[W]H[L]T[Q]S[H]A[P]D[Q]E[D]K[I]T[W]I[H]S[H]V[V]S[K]D[I]N[T]L[E]I[M]L[I]C[R]K[A]L[N]---Q[Q]Q[S]G[V]D[K]E[F]V[A]L[F]T[V]D[E]N[E]S[W]L[S]K[N]I[F]R 247  
 H\_magnipapillata/1-714 TTY[Y]K[F]-----K[A]E[P]K[G]T[F]W-Y[H]S[H]V[G]S[Q]R---T[N]A[Y]A[F]I[I]K[E]R[E]K[V]N---T[E]K[I]T[D]V-----I[M]T[V]G[D]---W[H]H----- 212

M\_musculus/1-1159 CTN[P]N[S]V--D[K]S[D]A[V]F[Q]R[S]N[K]M[H]A[L]N[G]F[L]G[N]M[P]E[F]E[M]C[V]G[E]S[V]S[W]H[L]F[G]M[G]N[E]I[D]H[S]I[Y]E[Y]G[N]T[F]I[R]G[H]R[A]D[V]N[L]F[P]A[T]L[L]T[E] 333  
 H\_sapiens/1-1159 CTN[P]D[S]V--D[K]K[D]A[V]F[Q]R[S]N[K]M[H]A[L]N[G]Y[L]F[G]N[F]P[D]L[M]C[V]G[E]S[V]S[W]H[L]F[G]M[G]N[E]I[D]H[S]I[Y]E[Y]G[N]T[F]I[R]G[H]R[A]D[V]N[L]F[P]A[T]L[L]T[E] 334  
 Ap\_pallida/1-1121 C[S]N[P]T[K]A[K]N[S]K[E]K[E]D[F]E[A]N[K]M[H]T[IN]G[M]F[A]N[L]P[D]L[K]C[V]H[K]T[I]S[W]H[L]F[G]I[G]N[E]V[D]I[H]T[A]Y[F]H[G]Q[T]V[D]I[N]S[H]R[K]D[I]A[S]L[L]P[A]T[F]V[T]A[T] 343  
 Ac\_millepora/1-1114 C[S]D[P]T[R]V--N[P]D[D]E[F]K[E]S[N]K[M]H[A]I[N]G[Y]F[G]N[L]P[D]L[M]C[V]G[E]S[V]K[W]H[L]A[G]I[G]N[E]V[D]I[H]T[A]Y[F]H[G]Q[S]F[T]I[D]G[H]R[K]D[V]A[S]L[L]P[A]T[F]V[T]A[S] 351  
 H\_magnipapillata/1-714 ---K[T]S[E]E[V]Y-----L[K]M[V]Y[G]I[G]M[K]P[F]N[V]S[Q]T[V]D---G[L]S[E]G[V]P[W]V----- 233

M\_musculus/1-1159 M[I]V[E]N[P]G[K]W[M]I[T]C[Q]V[S]D[H]L[Q]A[G]M[L]G[Q]Y[S]V[G]N[C]R[G]N[A]-P[H]F[K]V[Q]-E[Q]R[R]Y[F]I[A]E[K]V[L]W[D]Y[G]P[Q]G[Y]D[K]F[T]G[F]P[L]N[T]S[G]S[D]A[V]Y[F]T[Q]A 419  
 H\_sapiens/1-1159 M[I]A[E]N[P]G[K]W[M]I[T]C[Q]V[S]D[H]L[Q]A[G]M[L]G[Q]Y[V]D[N]C[S]D[I]-F[Y]P[K]R[S]-E[Q]R[R]Y[F]I[A]E[K]I[L]W[D]Y[A]P[Q]G[Y]N[K]F[S]G[L]P[L]N[A]S[G]S[D]L[Y]F[T]Q[G] 420  
 Ap\_pallida/1-1121 M[R]A[H]N[P]G[T]W[M]V[N]C[V]O[D]H[Y]N[A]G[M]Y[A]L[F]N[V]S[S]C[S]R[Q]-A[S]P[Q]M[S]E[K]T[R]T[Y]I[A]E[V]I[W]D[Y]G[P]S[M]N[K]Y[K]G[E]L[E]A[S]G[S]D[A]V[F]P[R]G 429  
 Ac\_millepora/1-1114 M[K]A[L]N[P]G[K]W[M]L[N]E[L]V[N]D[H]Y[N]A[G]M[Y]L[F]N[V]T[K]G[P]K[V]G[V]A[S]V[S]G[E]K[R]T[Y]F[I]A[A]E[V]E[W]N[Y]G[P]T[V]N[G]M[D]G[Q]S[I]A[P]G[S]D[A]V[F]A[F]A[N] 421  
 H\_magnipapillata/1-714 A[L]I[E]C[K]G[K]Y[R]I[D]-----P[N]T[G]K[N]G[A]P[L]T[W]Y[T]K[R]H[K]Y[R]F----- 286

M\_musculus/1-1159 DNR[IG]G[K]Y[K]A[R]Y[E]Y[D]A[T]F[S]R[R]K[M]P[S]D[S]E[A]H[L]G[L]G[V]P[I]K[A]E[V]G[D]I[L]L[W]T[F]A[N]K[D]K[V]Y[S]I[L]P[H]G[V]F[Y]D[K]S[A]A[P]N[V]D[G]F---L[K] 504  
 H\_sapiens/1-1159 DNR[IG]G[K]Y[K]V[R]Y[E]F[D]A[T]F[T]R[K]R[L]S[A]E[A]H[L]G[L]G[V]P[I]K[A]E[V]G[D]I[L]L[W]T[F]A[N]K[D]K[V]Y[S]I[L]P[H]G[V]I[Y]D[K]S[A]A[P]N[V]D[G]F---V[K] 505  
 Ap\_pallida/1-1121 AHR[IG]G[R]Y[K]A[L]Y[E]Y[D]S[S]F[T]Y[K]---N[S]I[H]L[G]F[L]G[V]P[I]R[A]E[V]G[D]T[V]R[V]F[K]L[A]S[R]S[Y]I[A]H[G]V[F]F[K]N[S]E[G]L[Y]N[D]T[F]---A[K] 512  
 Ac\_millepora/1-1114 AQR[IG]G[T]Y[K]A[I]Y[E]Y[D]A[R]F[S]T[K]V---K[P]E[L]H[G]L[G]V[P]I[R]A[E]V[N]D[I]I[E]V[V]E[K]N[A]R[F]N[F]S[I]P[H]G[V]F[F]K[S]N[E]G[A]L[Y]E[D]G[T]S[R]A[Q] 506  
 H\_magnipapillata/1-714 ---R[S]I[N]V[G]T[I]Y[M]R[I]S[V]D[G]H[E]I[S]V---A[S]D[G]Y[I]K[P]Y-----S[A]E[S]V[I]H[P]G-----E[R] 331

M\_musculus/1-1159 P[G]A[H]V[K]P[G]E[F]T[Y]R[W]T[V]P[S]V[S]P[D]E[P]P[L]L[T]Y[L]F[S]A[V]Q[P]I[K]D[S]A[G]L[V]G[P]L[L]V[K]K[G]T[L]N[A]D[G]T[Q]K[G]I[D]K[E]F[Y]L[L]F[T]V[D]E[N]F[S]S 592  
 H\_sapiens/1-1159 P[G]A[H]V[K]P[G]E[F]T[Y]K[W]T[V]P[S]V[S]T[A]D[P]P[L]L[T]Y[L]F[S]A[V]D[P]I[K]D[S]S[L]G[V]P[L]L[V]K[K]G[V]L[N]A[D]G[T]Q[K]I[D]K[E]F[Y]L[L]F[T]V[D]E[N]S[R]Y 593  
 Ap\_pallida/1-1121 Q[D]I[V]K[R]N[T]Y[V]Y[T]W[T]V[D]E[G]P[A]K[E]D[T]Q[C]V[W]A[Y]S[L]D[P]V[K]D[Y]S[G]L[G]P[L]L[T]C[R]K[G]T[L]N[A]E[G]Q[N]I[D]K[E]F[Y]L[L]M[V]M[V]D[E]S[M]S[W] 600  
 Ac\_millepora/1-1114 A[D]N[V]Q[R]G[T]F[T]Y[R]W[V]P[E]E[G]T[S]D[A]A[C]I[T]W[Y]Y[S]S[V]D[P]V[K]D[Y]S[G]L[G]P[L]L[T]C[K]K[G]T[L]N[D]N[T]R[K]D[T]K[E]F[Y]L[L]F[T]V[D]E[S]S[W] 594  
 H\_magnipapillata/1-714 F[D]F[L]N[A]N[K]T[I]D[N]Y[I]R[T]S[M]E[D]G[V]Q[N]S[V]Q[A]I[L]H[Y]E[G]A[S]N[E]P[L]T[S]K[V]Q---L[K]G[S]---S[C]V[N]C[P]K--- 397

M\_musculus/1-1159 L[D]E[N]I[K]F[T]W[G]P[S]V[D]K[E]D[K]E[F]V[K]S[N]R[M]H[A]N[G]V[Y]M[G]N[P]L[E]M[C]K[R]D[R]V[S]W[H]I[G]L[G]T[D]D[M]H[G]V[F]Q[N]T[I]H[L]R[G]T[H]R[D]S[L]A[L]F[H] 680  
 H\_sapiens/1-1159 F[D]E[N]I[K]F[I]W[H]P[F]S[I]D[K]E[K]E[F]V[K]S[N]R[M]H[A]N[G]V[Y]M[G]N[P]L[E]M[C]K[R]D[R]V[S]W[H]I[G]L[G]T[D]D[M]H[G]V[F]Q[N]T[I]H[L]R[G]T[H]R[D]S[L]A[L]F[H] 681  
 Ap\_pallida/1-1121 H[E]E[N]K[R]M[F]D[T]P[S]G[I]T--E[N]E[D]Y[L]E[S]N[K]M[H]G[I]N[G]R[L]Y[A]N[L]D[L]E[M]C[T]F[D]K[V]S[W]H[L]F[G]N[E]V[D]M[H]T[I]A[V]F[G]N[H]R[K]D[S]L[L]P[G] 687  
 Ac\_millepora/1-1114 H[E]K[N]E[K]M[A]N[I]L[I]N[D]--D[E]D[E]Y[K]E[S]N[K]M[H]G[I]N[G]F[Y]A[N]L[P]G[E]M[L]G[D]T[I]S[W]H[V]I[G]L[G]N[E]V[D]M[H]TAY[Y]F[G]S[K]V[T]H[Q]S[V]K[D]T[V]S[L]P[G] 685  
 H\_magnipapillata/1-714 P[E]H[L]N[K]D---V[L]M[S]D[L]Q[N]A[D]D[E]P[S]T[F]A[D]S[K]E[Y]-----F[L]N[F]A----- 641

M\_musculus/1-1159 M[A]T[T]A[Y]M[Q]P[D]H[S]G[I]F[K]V[F]C[S]T[L]P[H]F[T]R[G]M[G]Q[I]Y[E]I[S]S[C]G[N]R[D]P[S]E[P]P[Y]G[M]L[R]T[F]F[I]A[A]E[V]E[W]D[Y]A[P]N[K]N[W]E[F]E[K]Q[H]L[D]A[G]E[R]H[G]D[I] 768  
 H\_sapiens/1-1159 M[A]T[T]A[Y]M[Q]P[D]H[A]G[I]F[R]V[F]C[A]T[M]P[H]L[S]R[G]M[G]Q[I]Y[E]V[S]C[D]N[R]D[P]S[E]Q[R]Y[G]M[I]R[T]F[Y]I[A]A[E]V]E[W]D[Y]A[P]N[K]N[W]E[F]E[K]Q[H]V[D]A[R]G[E]R[H]G[D]I 769  
 Ap\_pallida/1-1121 T[F]T[A]T[M]T[P]D[N]K[E]W[A]L[I]C[K]T[D]H[F]S[A]G[M]Q[A]K[F]V[N]E[C]---N[P]S[T]E[I]S[G]K[T]R[R]Y[I]A[A]E[V]E[W]D[Y]A[P]T[G]K[D]I[L]G[N]K[T]L[E]E---S[E]H[A]K 772  
 Ac\_millepora/1-1114 V[F]G[T]L[M]T[P]D[N]A[G]D[W]A[L]V[E]R[T]N[D]H[Y]S[A]G[M]Q[A]K[F]V[N]T[C]---N[R]N[P]L[K]T[S]G[K]T[R]D[Y]I[A]A[E]E]M[E]W[D]Y[A]P[T]G[L]D[A]L[D]G[K]K[L]Q[D]---S[E]A[E]K 766  
 H\_magnipapillata/1-714 A[N]T---G[R]K[F]E[F]P[G]V---N[S]L[T]Q[G]E[I]D[S]Y[D]C[N]K[H]D[C]G[L]D--- 479

M\_musculus/1-1159 F[M]N[H]T[E]N[W]I[G]S[Q]Y[R]K[V]V[Y]E[Y]N[T]D[E]F[V]E[I]K[A]R[P]Q[E]E[H]L[L]G[P]M[I]H[A]E[V]G[D]S[I]L[I]I[F]K[N]K[A]S[R]P[Y]S[A]A[G]V---E[D]S[N] 845  
 H\_sapiens/1-1159 F[M]N[R]T[E]N[W]I[G]S[Q]Y[K]V[V]Y[E]Y]D[E]F[V]E[I]K[A]R[P]R[E]E[H]L[L]G[P]M[I]H[A]E[V]G[D]S[I]L[I]I[F]K[N]K[A]S[R]P[Y]S[A]A[G]V---E[E]M[D] 846  
 Ap\_pallida/1-1121 F[T]I[N]S[N]N[R]I[G]R[V]Y[K]A[Y]R[E]F[D]D[F]T[K]E[K]R[D]R[K]Y[L]G[V]P[I]V]Y[A]E[V]G[D]I[E]I[V]F[K]N[K]A[S]R[D]Y[S]V[H]P[H]G[V]F[N]N[K]E[G]S[D]Y[M]D[G]S 860  
 Ac\_millepora/1-1114 F[T]V[T]S[D]K[R]I[G]R[V]Y[K]A[Y]R[E]F[D]D[F]T[K]E[K]R[D]R[K]Y[L]G[V]P[I]V]Y[A]E[V]G[D]I[K]V[V]E[K]N[A]R[N]Y[S]V[H]P[H]G[V]L[Y]S[K]A[H]E[G]S[D]Y[M]D[G]S 854  
 H\_magnipapillata/1-714 ---K[V]C[Y]C[H]Y-----E[L]K[I]P[R]D[K]T[I]Q---M[I]F[T]N[I]E-----S[G]A[G]W[G]H[P]I[H]L[H]G--- 517

M\_musculus/1-1159 N[G]K[L]L[N]V[P]T[K]P[G]E[I]K[T]Y[R]W[V]P[K]R[S]G[P]G[S]D[P]N[C]I[P]W[V]Y[F]S[T]A[N]F[V]K[D]T[Y]S[L]G[M]P[L]I[T]C[R]E[G]V[L]N[E]-K[G]R[R]S[D]V[D]Y[E]F[A]L[L]F[V]N 932  
 H\_sapiens/1-1159 S[G]K[Q]F[V]P[M]T[K]P[G]E[V]K[T]Y[R]W[V]I[P]K[R]S[G]P[G]S[D]P[N]C]I[P]W[V]Y[F]S[T]V[N]F[V]K[D]T[Y]S[L]G[M]P[L]I[T]C[R]K[G]V[L]N[E]-K[G]R[R]S[D]V[D]Y[E]F[A]L[L]F[V]N 933  
 Ap\_pallida/1-1121 N[G]A[A]K[N]D[N]R[I]K[P]S[T]K[Y]T[Y]T[W]S[V]P[E]R[A]G[P]D[S]Q[D]A[C]T[L]W[A]Y[S]D[V]S[V]K[D]A[N]T[G]L[V]G[P]L[V]C[K]R[G]T[L]T[A]-E[G]K[P]D[V]N[E]D[F]A[L]L[F]T[V]M[D] 947  
 Ac\_millepora/1-1114 S[G]A[D]K[L]D[N]A[I]Q[P]G[K]T[Y]T[I]W[S]V[E]R[A]G[P]K[G]D[G]P[A]C[T]R[A]L[W]A[Y]S[D]V[N]P[I]K[D]T[S]L[G]I[G]P[L]I[K]G[K]L[K]E[G]T[E]R[S]D[V]R[E]F[V]L[M]F[V]T[V]M[D] 942  
 H\_magnipapillata/1-714 ---H[S]F-----V[L]K[M]D[Y]A[P]Q[N]I[T]-T[A]K[L]I[N]A[T]E[N]-----K[D]I[D]C[G]R[G]----- 551

M\_musculus/1-1159 E[N]E[S]W[Y]L[D]D[N]I[K]K[Y]L[N]--K[D]P[R]D[F]K[H]T[D]D[F]E[S]N[K]M[H]A[I]N[G]K[I]F[G]N[L]P[E]I[M]T[E]D[S]M[T]N[W]Y[L]L[G]I[G]S[E]V[D]I[H]T[I]H[Y]H[A]E[S]F[L]K[I]D[K]S 1018  
 H\_sapiens/1-1159 E[N]E[S]W[Y]L[D]D[N]I[K]K[Y]L[N]--K[D]P[R]D[F]K[H]T[D]D[F]E[S]N[K]M[H]A[I]N[G]K[I]F[G]N[L]P[E]I[M]N[E]D[T]M[T]N[W]Y[L]L[G]I[G]S[E]V[D]I[H]T[I]H[Y]H[A]E[S]F[L]K[I]D[K]S 1019  
 Ap\_pallida/1-1121 E[N]E[S]W[Y]L[D]D[N]I[K]K[Y]C[T]A[R]V[D]K---D[E]F[Q]E[S]N[K]M[H]I[N]G[V]F[G]N[I]P[E]L[E]M[V]D[N]V[S]W[Y]L[L]G[L]T[A]R[V]E[D]M[H]T[V]H[F]H[G]S[V]F[V]Q[S]S[S]Y 1031  
 Ac\_millepora/1-1114 E[N]E[S]W[Y]L[D]E[N]I[K]K[Y]C[K]N[P]C[K]E[T]L[A]D[D]D[F]E[S]N[K]M[H]I[N]G[V]F[G]N[I]P[E]L[E]M[V]D[E]K[V]D[W]L[L]G[I]G]N[E]V[D]M[H]T[V]H[F]H[G]Q[S]F[L]K[K]Q[V]S[Y] 1030  
 H\_magnipapillata/1-714 ---Q[X]F[C]N[E]P[K]W[K]-----N[K]Q[W]N-----G[N]I[P]G[L]N[L]I[N]P--- 579

M\_musculus/1-1159 Y---R[E]D[V]Y[D]L[F]P[G]T[F]Q[T]I[E]L[F]A[D]H[P]G[T]W[L]H[C]H[V]S[D]H[I]A[G]M[E]T[T]Y[T]V[L]R[N]I[D]N[R]I[P]Y[S]T[K]P[S]G[A]G[S]H[A]V[T]V[S]P[S]Q[E]P[G]K[E]----- 1098  
 H\_sapiens/1-1159 Y---R[E]D[V]Y[D]L[F]P[G]T[F]Q[T]I[E]L[F]A[D]H[P]G[T]W[L]H[C]H[V]S[D]H[I]A[G]M[E]T[T]Y[T]V[L]R[N]I[D]N[R]I[P]Y[S]T[S]P-G[V]A[S]H[P]A[T]V[S]N[E]R[P]K[E]----- 1098  
 Ap\_pallida/1-1121 H[P]E[G]M[R]G[D]V[Y]D[L]F[P]G[V]F[A]T[V]K[M]V[P]S[I]G[M]H[C]H[V]N[D]H[A]G[C]M[E]A[R]F[V]R-----E[K]P[T]V[S]I[T]H[F]K[P]K[G]----- 1097  
 Ac\_millepora/1-1114 H---R[E]D[V]Y[D]L[F]P[G]V[F]A[T]V[E]M[V]P[S]T[E]D[W]L[H]C]H[V]N[D]H[A]G[C]M[E]T[L]S[V]L-----D[K]S[L]K[T]T[P]K[I]T[A]----- 1090  
 H\_magnipapillata/1-714 ---R[K]B[L]I[I]P[T]G[G]Y[V]L[R]F[K]S[N]P[K]W[F]L[H]C[H]I[E]V[H]A[L]D[G]M[A]M[I]-----S[E]A[V]N[E]A[P]K[P]K[G]F[P]V[C] 639

M\_musculus/1-1159 -----E[L]Y[F]F[G]K[N]L[R]P[G]A[K]A[L]V[L]F----I[L]G[L]L[L]---V[A]T[V]V[L]A[L]R[L]S[S]R[R]Q[M]A[Y]R[V]Q[S]C[A]L[P]T[D]A[L] 1159  
 H\_sapiens/1-1159 -----Q[L]Y[F]F[G]K[N]L[G]P[T]G[A]K[A]L[V]L[F]----I[L]G[L]L[L]---I[T]T[V]I[L]S[L]R[L]C[S]A[M]K[Q]T[D]Y[Q]Q[V]S[C]A[L]P[T]D[A]L 1159  
 Ap\_pallida/1-1121 -----Q[A]Y[K]P-----S[A]Q[S]I[F]V[L]M---I[M]A[T]L[L]I[V]L--- 1121  
 Ac\_millepora/1-1114 -----A[S]S[F]-----V[T]S[S]I[F]Y[L]---S[F]P[V]L[A]---L[V]K[A]----- 1114  
 H\_magnipapillata/1-714 N[F]Y[N]D[L]S[R]D[Y]F[T]R[E]D[S]V[N]T[D]C[T]N[A]K[Y]L[A]T[A]I[A]L[S]V[L]F[V]N[V]V[T]S[I]V[I]W[K]Y[R]Q[K]K[L]H[N]G[K]D[V]G[T]V[L]N[E]I 714

Figure S8 - Multiple sequence alignment showing the sequence similarities between hephaestin-like proteins from *Acropora millepora* (Uniprot Ac. No.: B3E[W]Z9), *Aiptasia pallida* (NCBI GI: 387005847), *Homo sapiens* (Uniprot Ac. No.: Q6M[Z]M0), *Mus musculus* (Uniprot Ac. No.: Q3V1H3) and the cupredoxin-domain containing protein from *Hydra magnipapillata* (NCBI GI: 221113181). Conservation of residues is dyed by shades of blue: the darker the color, the

more conserved the residue among the five species. Sequence alignments were performed with MUSCLE (Edgar 2004) and visualized with Jalview (Waterhouse et al. 2009).

#### References:

- Edgar RC. 2004. MUSCLE: multiple sequence alignment with high accuracy and high throughput. *Nucleic Acids Res.* 32:1792–1797.
- Gouet P, Courcelle E, Stuart DI, Métoz F. 2000. ESPript: analysis of multiple sequence alignments in PostScript. *Bioinformatics.* 15:305–308.
- Nothdurft LD, Webb GE. 2006. Microstructure of common reef-building coral genera *Acropora*, *Pocillopora*, *Goniastrea* and *Porites*: constraints on spatial resolution in geochemical sampling. *Facies.* 53:1–26.
- Waterhouse AM, Procter JB, Martin DM a, Clamp M, Barton GJ. 2009. Jalview Version 2--a multiple sequence alignment editor and analysis workbench. *Bioinformatics.* 25:1189–1191.
- Wendt J. 1990. Corals and coralline sponges. In: Carter J, editor. *Skeletal Biomineralization: Patterns, Processes and Evolutionary Trends, Volume I.* Van Nostrand Reinhold (New York). p. 45–66.
