# Supplementary material for: The Skeletal Proteome of the Coral Acropora millepora: The Evolution of Calcification by Co-Option and Domain Shuffling
Source: PubMed Central journal article supplement — Mol Biol Evol. 2013 Jun 12;30(9):2099–112. doi: 10.1093/molbev/mst109 (PMC3748352; doi:10.1093/molbev/mst109), 2013-06-12
Supplement: supp_mst109_Supporting_File_2.pdf [file supp_mst109_Supporting_File_2.pdf]

## Supporting Information

Table S4 - Differential expression of genes involved in *Acropora millepora* biomineralization according to a previous experiment on primary polyps (Moya *et al.* 2012): up-regulated genes (green), down-regulated genes (red), not available (-). Fold-changes (P value > 0.05) were obtained through the analysis of the count data available on the NCBI Gene Expression Omnibus database (GEO) under accession number GSE33016, using the edgeR package (Robinson *et al.* 2010). Transcript levels were originated from *Acropora millepora* primary polyps at 380 (control), 750 and 1000 ppm CO2 after 3 days exposure.

| Protein Groups                | Cluster        | NCBI Ac. No.           | Protein Names                                     | Fold Change                  |                               |
|-------------------------------|----------------|------------------------|---------------------------------------------------|------------------------------|-------------------------------|
|                               |                |                        |                                                   | CO2 750 ppm<br>(vs. Control) | CO2 1000 ppm<br>(vs. Control) |
| Acidic                        | Cluster009205  | JT001945               | SAARP 1                                           | 1.41                         | 2.32                          |
|                               | Cluster008253  | JR972076               | Acidic SOMP                                       | -                            | -1.79                         |
|                               | Cluster017392  | JR991407               | SAARP2                                            | -                            | -2.29                         |
|                               | Cluster018838  | JT006291               | SAP1                                              | 2.01                         | 3.23                          |
|                               | Cluster037255  | JT018094               |                                                   | 3.77                         | 5.85                          |
|                               | Cluster022029  | JR983041               | SAP2                                              | 1.81                         | 2.05                          |
|                               | Cluster014254  | JR983175               | Glu-rich protein                                  | 1.93                         | 1.51                          |
| Extracellular matrix proteins | Cluster001173  | JR987773               | Mucin-like                                        | -                            | 2.08                          |
|                               | Cluster001025  | JT016638               | Coadhesin                                         | 1.90                         | 1.95                          |
|                               | Cluster000033  | JT011118               | MAM and LDL-receptor domain- containing protein 1 | 3.81                         | 3.94                          |
|                               | Cluster000006  | JR994474               | MAM and LDL-receptor domain- containing protein 2 | 2.29                         | 2.51                          |
|                               | Cluster014354  | JT013896               | Thr-rich protein                                  | 1.87                         | 1.80                          |
|                               | Cluster010848  | JR978035               | Ectin                                             | -                            | 3.24                          |
|                               | Cluster012957  | JT013217               | MAM and fibronectin- containing protein           | 6.70                         | 8.95                          |
|                               | Cluster007429  | JT016410               | MAM and fibronectin containing protein (isoform)  | -                            | 1.77                          |
|                               | Cluster000133  | JR991141               | PKD1-related protein                              | 1.98                         | 2.15                          |
|                               | Cluster011245  | JR973492<br>(JN631095) | Zona pellucida domain-containing protein          | -1.42                        | -1.86                         |
|                               | Cluster001085  | JR980881               | EGF and laminin G domain-containing protein       | -                            | 1.44                          |
|                               | Cluster000035  | JT011093               | Protocadherin-like                                | 1.62                         | -                             |
|                               | Cluster050343  | JR991083               | Collagen                                          | 8.07                         | 11.68                         |
|                               | Cluster000565m | JR993827               | Neuroglian-like                                   | 2.60                         | 1.88                          |
|                               | Cluster015162  | JR989025               | CUB domain-containing protein                     | 1.87                         | 2.87                          |
| Enzymes                       | Cluster002345  | JT019463               | Hephaestin-like                                   | 2.23                         | 3.52                          |
|                               | Cluster020494  | JR998014               | Carbonic anhydrase                                | -                            | -                             |

|                          |                |                        |                                                  |       |       |
|--------------------------|----------------|------------------------|--------------------------------------------------|-------|-------|
|                          | Cluster023283  | JR970990               | CUB and Ser protease domain-containing protein 1 | 7.24  | 9.54  |
|                          | Cluster005989  | JT008002               | CUB and Ser protease domain-containing protein 2 | -     | -     |
| Uncharacterized proteins | Cluster013356  | JR993391<br>(HM163215) | Galaxin                                          | 1.69  | 2.81  |
|                          | Cluster015317  | JR976690               | Galaxin 2                                        | -     | -     |
|                          | Cluster013623  | JT021412               | USOMP-1                                          | 2.03  | -     |
|                          | Cluster008498  | JR982706               | USOMP-2                                          | -3.14 | -2.29 |
|                          | Cluster017073  | JR997000               | USOMP-3                                          | 1.53  | 1.96  |
|                          | Cluster026302  | JT004498               | USOMP-4                                          | -     | -     |
|                          | Cluster020453  | JR973117               | USOMP-5                                          | 3.96  | 5.03  |
|                          | Cluster012833  | JR971508               | USOMP-6                                          | -     | -     |
|                          | Cluster001446p | JR998260               | USOMP-7                                          | 4.16  | 6.67  |
| Cluster006620            | JT014391       | USOMP-8                | -                                                | -     |       |
| Toxin                    | Cluster001924  | JR986059               | Protein similar to cephalotoxin                  | -     | -     |

Table S5: **Results from the comparison of the domains from *Acropora millepora* SOMPs versus those identified in other skeletal proteomes from *Strongylocentrotus purpuratus* (tooth, spicules, test and spine) (Mann et al. 2008a, 2008b; Mann et al. 2010), *Gallus gallus* (eggshell) (Jonchère et al. 2010; Mann et al. 2006; Miksik et al. 2010), *Lottia gigantea* (shell) (Marie et al. 2012), *Pinctada margaritifera* and *P. maxima* (shell) (Marie et al. 2012), *Stylophora pistillata* (Drake et al. 2013) and *Crassostrea gigas* (shell) (Zhang et al. 2012).** + indicates domains from proteins that were identified through proteomics and are expressed in skeleton secreting-tissues, or have further experimental evidence of involvement in biomineralization, (+) indicates domains from proteins identified in the organic matrix only by proteomics but for which no other evidence related to biomineralization is currently available. \* Domains corresponding to more than one InterPro entry (*i.e.* with parent/child relationship), <sup>a</sup> Domains identified only in corals and <sup>b</sup> Databases containing intracellular proteins.

| <i>Acropora millepora</i>              |                                                     | Versus species: | <i>S. purpuratus</i> <sup>b</sup>     | <i>G. gallus</i> <sup>b</sup> | <i>L. gigantea</i> | <i>P. margaritifera</i><br><i>P. maxima</i> | <i>S. pistillata</i> <sup>b</sup> | <i>C. gigas</i> <sup>b</sup> |
|----------------------------------------|-----------------------------------------------------|-----------------|---------------------------------------|-------------------------------|--------------------|---------------------------------------------|-----------------------------------|------------------------------|
| Key domains<br>(as in Figure 4)        | InterPro entries identified in the SOMPs            | Structure:      | Tooth,<br>spicules,<br>test and spine | Eggshell                      | Shell              | Shell                                       | Skeleton                          | Shell                        |
|                                        |                                                     | Interpro no:    |                                       |                               |                    |                                             |                                   |                              |
| Thrombospondin                         | Thrombospondin, type 1 repeat                       | IPR000884       | (+)                                   | +                             | -                  | -                                           | (+)                               | (+)                          |
| Nidogen                                | Nidogen, extracellular domain                       | IPR003886       | (+)                                   | (+)                           | -                  | -                                           | -                                 | (+)                          |
| AMOP                                   | AMOP                                                | IPR005533       | (+)                                   | -                             | -                  | -                                           | (+)                               | (+)                          |
| von Willebrand factor, type D          | von Willebrand factor, type D domain                | IPR001846       | (+)                                   | (+)                           | -                  | -                                           | (+)                               | (+)                          |
| von Willebrand factor, type A          | von Willebrand factor, type A                       | IPR002035       | (+)                                   | (+)                           | +                  | +                                           | (+)                               | +                            |
| Epidermal growth factor*               | Epidermal growth factor-like domain                 | IPR000742       | (+)                                   | +                             | +                  | +                                           | (+)                               | +                            |
|                                        | EGF-like calcium-binding                            | IPR001881       | (+)                                   | +                             | -                  | -                                           | (+)                               | (+)                          |
| Coagulation factor 5/8 CT type domain* | Coagulation factor 5/8 C-terminal type domain       | IPR000421       | +                                     | (+)                           | -                  | -                                           | (+)                               | (+)                          |
|                                        | Galactose-binding domain-like                       | IPR008979       | +                                     | (+)                           | -                  | -                                           | (+)                               | (+)                          |
| CAP                                    | CAP domain                                          | IPR014044       | (+)                                   | -                             | +                  | +                                           | -                                 | (+)                          |
| MAM domain*                            | MAM domain                                          | IPR000998       | (+)                                   | (+)                           | -                  | -                                           | (+)                               | (+)                          |
|                                        | Concanavalin A-like lectin/glucanase                | IPR008985       | (+)                                   | (+)                           | -                  | +                                           | (+)                               | +                            |
| Ricin B lectin domain                  | Ricin B lectin domain                               | IPR000772       | -                                     | (+)                           | -                  | -                                           | -                                 | -                            |
|                                        | Fibronectin, type III                               | IPR003961       | +                                     | +                             | -                  | +                                           | -                                 | +                            |
| Fibronectin type III*                  | Fibronectin type III C-terminal domain <sup>a</sup> | IPR026966       | -                                     | -                             | -                  | -                                           | -                                 | -                            |

|                                          |                                                       |           |     |     |   |   |     |     |
|------------------------------------------|-------------------------------------------------------|-----------|-----|-----|---|---|-----|-----|
| ZP sperm-binding                         | Zona pellucida sperm-binding protein                  | IPR001507 | -   | (+) | + | + | (+) | +   |
| CUB                                      | CUB                                                   | IPR000859 | (+) | +   | + | - | -   | (+) |
| Laminin G*                               | Laminin G domain                                      | IPR001791 | (+) | (+) | - | - | (+) | (+) |
|                                          | Concanavalin A-like lectin/glucanase, subgroup        | IPR013320 | (+) | +   | - | + | (+) | +   |
| Carbohydrate-binding WSC*                | Carbohydrate-binding WSC                              | IPR002889 | (+) | -   | - | - | -   | -   |
|                                          | Carbohydrate-binding WSC, subgroup <sup>a</sup>       | IPR013994 | -   | -   | - | - | -   | -   |
| PKD/Chitinase domain*                    | PKD domain                                            | IPR000601 | -   | (+) | - | - | -   | (+) |
|                                          | PKD/Chitinase domain <sup>a</sup>                     | IPR022409 | -   | -   | - | - | -   | -   |
|                                          | PKD/REJ-like protein                                  | IPR002859 | -   | -   | - | - | -   | (+) |
| PKD/REJ-like protein*                    | Egg jelly receptor, REJ-like <sup>a</sup>             | IPR014010 | -   | -   | - | - | -   | -   |
| GPS                                      | GPS domain                                            | IPR000203 | (+) | -   | - | - | -   | -   |
| Cadherin*                                | Cadherin                                              | IPR002126 | +   | +   | - | - | (+) | (+) |
|                                          | Cadherin-like                                         | IPR015919 | (+) | +   | - | - | (+) | (+) |
| P-type trefoil <sup>a</sup>              | P-type trefoil <sup>a</sup>                           | IPR000519 | -   | -   | - | - | (+) | -   |
| Fibrillar collagen, CT                   | Fibrillar collagen, C-terminal                        | IPR000885 | +   | +   | - | - | -   | -   |
| Collagen triple helix repeat             | Collagen triple helix repeat                          | IPR008160 | +   | +   | - | - | -   | (+) |
|                                          | Immunoglobulin subtype 2                              | IPR003598 | +   | (+) | - | - | -   | +   |
|                                          | Immunoglobulin subtype                                | IPR003599 | +   | (+) | - | - | -   | +   |
| Immunoglobulin-like*                     | Immunoglobulin-like                                   | IPR007110 | +   | +   | - | - | -   | +   |
|                                          | Immunoglobulin I-set                                  | IPR013098 | +   | (+) | - | - | -   | +   |
|                                          | Immunoglobulin-like fold                              | IPR013783 | +   | +   | - | + | -   | +   |
| Low-density lipoprotein receptor         | Low-density lipoprotein (LDL) receptor class A repeat | IPR002172 | (+) | (+) | - | - | (+) | -   |
| Lipoxygenase <sup>a</sup>                | Lipoxygenase, LH2 <sup>a</sup>                        | IPR001024 | -   | -   | - | - | -   | -   |
|                                          | Lipase/lipoxygenase, PLAT/LH2 <sup>a</sup>            | IPR008976 | -   | -   | - | - | -   | -   |
| Cupredoxin*                              | Cupredoxin                                            | IPR008972 | (+) | -   | - | - | -   | +   |
|                                          | Multicopper oxidase, type 2                           | IPR011706 | -   | -   | - | - | -   | +   |
|                                          | Multicopper oxidase, type 3                           | IPR011707 | (+) | -   | - | - | -   | +   |
| Alpha carbonic anhydrase                 | Alpha carbonic anhydrase                              | IPR001148 | +   | +   | + | + | +   | +   |
| Peptidase cysteine/serine, trypsin-like* | Peptidase S1/S6, chymotrypsin/Hap                     | IPR001254 | (+) | +   | - | - | -   | +   |
|                                          | Peptidase cysteine/serine, trypsin-like               | IPR009003 | (+) | (+) | - | - | -   | +   |
| Polycystin cation channel, PKD1/PKD2     | Polycystin cation channel, PKD1/PKD2                  | IPR013122 | -   | -   | - | - | -   | (+) |
| Neurexin/syndecan/glycophorin C          | Neurexin/syndecan/glycophorin C                       | IPR003585 | (+) | -   | - | - | -   | -   |
| Cadherin, cytoplasmic domain             | Cadherin, cytoplasmic domain                          | IPR000233 | -   | (+) | - | - | -   | (+) |

Table S6: **Comparison between *Acropora millepora* SOMPs** and the proteins identified in the skeletal organic matrix from *Stylophora pistillata* (Drake et al. 2013). Pairs of related proteins are indicated by x – for more than 35% of identity (min. 100 aa) and by X – for homologous pairs. Homology could not be determined for protein fragments (\*).

| S. pistillata                                     |                             |            |                      |                              |                  |            |             |                          |                              |                 |              |                       |                                |                       |              |                        |                                                   |                       |                                     |                                  |                       |                       |                      |                     |                  |                     |                       |                                   |                     |                                      |                 |                            |                                     |                                                   |                                    |                                   |  |  |  |   |  |  |
|---------------------------------------------------|-----------------------------|------------|----------------------|------------------------------|------------------|------------|-------------|--------------------------|------------------------------|-----------------|--------------|-----------------------|--------------------------------|-----------------------|--------------|------------------------|---------------------------------------------------|-----------------------|-------------------------------------|----------------------------------|-----------------------|-----------------------|----------------------|---------------------|------------------|---------------------|-----------------------|-----------------------------------|---------------------|--------------------------------------|-----------------|----------------------------|-------------------------------------|---------------------------------------------------|------------------------------------|-----------------------------------|--|--|--|---|--|--|
| A. millepora                                      | Protocadherin fat-like (P1) | CARP4 (P2) | Thrombospondin (P3)* | Viral inclusion protein (P4) | Hemicentin (P5)* | Actin (P6) | Actin (P7)* | Major yolk protein (P8)* | Protocadherin fat-like (P9)* | Cadherin (P10)* | Actin (P11)* | Unknown protein (P12) | Sushi domain-containing (P13)* | Collagen-alpha (P14)* | CARP5 (P15)* | Unknown protein (P16)* | Glyceraldehyde 3-phosphatase dehydrogenase (P17)* | Collagen alpha (P18)* | Contactin-associated protein (P19)* | MAM domain anchor protein (P20)* | Zona pellucida (P21)* | Unknown protein (P22) | Protocadherin (P23)* | Vitellogenin (P24)* | Ubiquitin (P25)* | Vitellogenin (P26)* | Integrin-alpha (P27)* | Late embryogenesis protein (P28)* | Tubulin-beta (P29)* | Myosin regulatory light chain (P30)* | Neurexin (P31)* | Kielin/Chordin like (P32)* | Flagellar associated protein (P33)* | MAM/LDL receptor domain containing protein (P34)* | Carbonic anhydrase (STPCA2) (P35)* | Zonadhesion-like precursor (P36)* |  |  |  |   |  |  |
|                                                   | SAARP 1                     |            | X                    |                              |                  |            |             |                          |                              |                 |              |                       |                                |                       |              | X                      |                                                   |                       |                                     |                                  |                       |                       |                      |                     |                  |                     |                       |                                   | X                   |                                      |                 |                            |                                     |                                                   |                                    |                                   |  |  |  |   |  |  |
| Acidic SOMP                                       |                             | X          |                      |                              |                  |            |             |                          |                              |                 |              |                       |                                |                       | X            |                        |                                                   |                       |                                     |                                  |                       |                       |                      |                     |                  |                     |                       | X                                 |                     |                                      |                 |                            |                                     |                                                   |                                    |                                   |  |  |  |   |  |  |
| SAARP2*                                           |                             | X          |                      |                              |                  |            |             |                          |                              |                 |              |                       |                                |                       | X            |                        |                                                   |                       |                                     |                                  |                       |                       |                      |                     |                  |                     |                       | X                                 |                     |                                      |                 |                            |                                     |                                                   |                                    |                                   |  |  |  |   |  |  |
| SAP1*                                             |                             |            |                      |                              |                  |            |             |                          |                              |                 |              |                       |                                |                       |              |                        |                                                   |                       |                                     |                                  |                       |                       |                      |                     |                  |                     |                       |                                   |                     |                                      |                 |                            |                                     |                                                   |                                    |                                   |  |  |  |   |  |  |
| SAP2*                                             |                             |            |                      |                              |                  |            |             |                          |                              |                 |              |                       |                                |                       |              |                        |                                                   |                       |                                     |                                  |                       |                       |                      |                     |                  |                     |                       |                                   |                     |                                      |                 |                            |                                     |                                                   |                                    |                                   |  |  |  |   |  |  |
| Glu-rich protein                                  |                             |            |                      |                              |                  |            |             |                          |                              |                 |              |                       |                                |                       |              |                        |                                                   |                       |                                     |                                  |                       |                       |                      |                     |                  |                     |                       |                                   |                     |                                      |                 |                            |                                     |                                                   |                                    |                                   |  |  |  |   |  |  |
| Mucin-like*                                       |                             |            |                      |                              | X                |            |             |                          |                              |                 |              |                       | X                              |                       |              |                        |                                                   |                       |                                     |                                  |                       |                       |                      |                     |                  |                     |                       |                                   |                     |                                      |                 |                            |                                     |                                                   |                                    |                                   |  |  |  |   |  |  |
| Coadhesin*                                        |                             |            | X                    |                              | X                |            |             |                          |                              |                 |              |                       |                                | X                     |              |                        |                                                   | X                     |                                     |                                  |                       |                       |                      |                     |                  |                     |                       |                                   |                     |                                      |                 |                            |                                     |                                                   |                                    |                                   |  |  |  |   |  |  |
| MAM and LDL-receptor domain-containing protein 1* |                             |            |                      |                              |                  |            |             |                          |                              |                 |              |                       |                                |                       |              |                        |                                                   |                       |                                     | X                                |                       |                       |                      |                     |                  |                     |                       |                                   |                     |                                      |                 |                            |                                     |                                                   |                                    | X                                 |  |  |  | X |  |  |
| MAM and LDL-receptor domain-containing protein 2* |                             |            |                      |                              |                  |            |             |                          |                              |                 |              |                       |                                |                       |              |                        |                                                   |                       |                                     | X                                |                       |                       |                      |                     |                  |                     |                       |                                   |                     |                                      |                 |                            |                                     |                                                   |                                    | X                                 |  |  |  | X |  |  |
| Thr-rich protein*                                 |                             |            |                      |                              |                  |            |             |                          |                              |                 |              |                       |                                |                       |              |                        |                                                   |                       |                                     |                                  |                       |                       |                      |                     |                  |                     |                       |                                   |                     |                                      |                 |                            |                                     |                                                   |                                    |                                   |  |  |  |   |  |  |
| Ectin*                                            |                             |            |                      |                              | X                |            |             |                          |                              |                 |              |                       |                                |                       |              |                        |                                                   |                       |                                     |                                  |                       |                       |                      |                     |                  |                     |                       |                                   |                     |                                      |                 |                            |                                     |                                                   |                                    |                                   |  |  |  |   |  |  |
| MAM and fibronectin-containing protein*           |                             |            |                      |                              |                  |            |             |                          |                              |                 |              |                       |                                |                       |              |                        |                                                   |                       |                                     |                                  |                       |                       |                      |                     |                  |                     |                       |                                   |                     |                                      |                 |                            |                                     |                                                   |                                    |                                   |  |  |  |   |  |  |
| MAM and fibronectin containing protein (isoform)* |                             |            |                      |                              |                  |            |             |                          |                              |                 |              |                       |                                |                       |              |                        |                                                   |                       |                                     |                                  |                       |                       |                      |                     |                  |                     |                       |                                   |                     |                                      |                 |                            |                                     |                                                   |                                    |                                   |  |  |  |   |  |  |
| PKD1-related protein*                             |                             |            |                      |                              |                  |            |             |                          |                              |                 |              |                       |                                |                       |              |                        |                                                   |                       |                                     |                                  |                       |                       |                      |                     |                  |                     |                       |                                   |                     |                                      |                 |                            |                                     |                                                   |                                    |                                   |  |  |  |   |  |  |
| Zona pellucida domain-containing protein          |                             |            |                      |                              |                  |            |             |                          |                              |                 |              |                       |                                |                       |              |                        |                                                   |                       |                                     |                                  |                       | X                     |                      |                     |                  |                     |                       |                                   |                     |                                      |                 |                            |                                     |                                                   |                                    |                                   |  |  |  |   |  |  |
| EGF and laminin G domain-containing protein       |                             |            |                      |                              |                  |            |             |                          |                              |                 |              |                       |                                |                       |              |                        |                                                   |                       | X                                   |                                  |                       |                       |                      |                     |                  |                     |                       |                                   |                     |                                      |                 | X                          |                                     |                                                   |                                    |                                   |  |  |  |   |  |  |
| Protocadherin-like                                | X                           |            |                      |                              |                  |            |             |                          | X                            | X               |              |                       |                                |                       |              |                        |                                                   |                       |                                     |                                  |                       |                       |                      |                     |                  |                     |                       |                                   |                     |                                      |                 |                            |                                     |                                                   |                                    |                                   |  |  |  |   |  |  |



- Marie B, Joubert C, Tayalé A, Zanella-Cléon I, Belliard C, Piquemal D, Cochenec-Laureau N, Marin F, Gueguen Y, Montagnani C. 2012. Different secretory repertoires control the biomineralization processes of prism and nacre deposition of the pearl oyster shell. *Proc Natl Acad Sci USA*. 109:20986-20991.
- Miksík I, Sedláková P, Lacinová K, Pataridis S, Eckhardt A. 2010. Determination of insoluble avian eggshell matrix proteins. *Anal Bioanal Chem*. 397:205-214.
- Moya A, Huisman L, Ball EE, Hayward DC, Grasso LC, Chua CM, Woo HN, Gattuso J.-P, Forêt S, Miller DJ. 2012. Whole Transcriptome Analysis of the Coral *Acropora millepora* Reveals Complex Responses to CO<sub>2</sub>-driven Acidification during the Initiation of Calcification. *Mol Ecol*. 21:2440-2454.
- Robinson MD, McCarthy DJ, Smyth GK. 2010. edgeR: a Bioconductor package for differential expression analysis of digital gene expression data. *Bioinformatics*. 26:139-140.
- Zhang G, Fang X, Guo X, et al. (85 co-authors). 2012. The oyster genome reveals stress adaptation and complexity of shell formation. *Nature*. 490:49-54.
